# Supplementary material for: Composition and functional diversity of bacterial communities during swine carcass decomposition
Source: PubMed Central journal article supplement (PMC10472150; doi:10.5713/ab.23.0140), 2023-06-26
Supplement: ab-23-0140-Supplementary-Fig-1.pdf [file ab-23-0140-Supplementary-Fig-1.pdf]

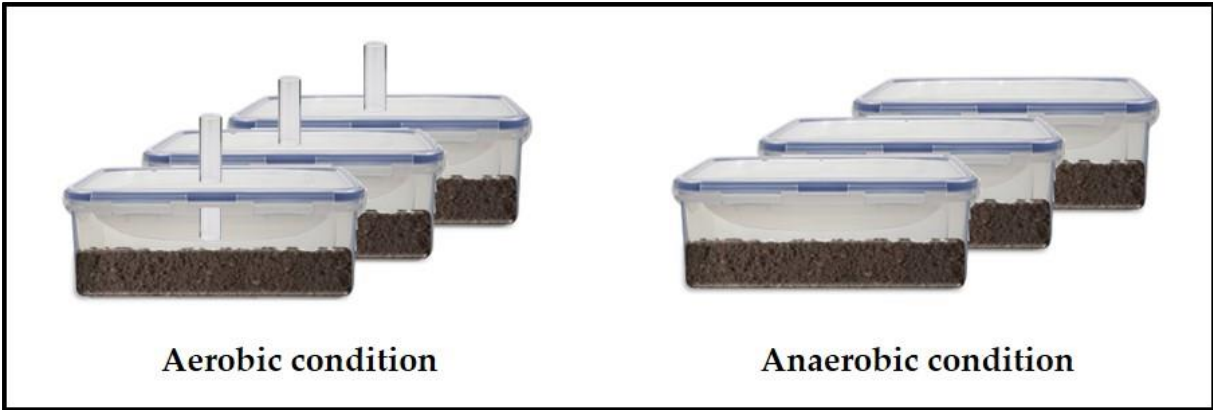

**Figure S1.** Illustration of the incubation boxes for aerobic and anaerobic conditions.
