# Supplementary material for: Composition and functional diversity of bacterial communities during swine carcass decomposition
Source: PubMed Central journal article supplement (PMC10472150; doi:10.5713/ab.23.0140), 2023-06-26
Supplement: ab-23-0140-Supplementary-Table-1.pdf [file ab-23-0140-Supplementary-Table-1.pdf]

Table S1. Taxonomic classification of bacterial genera present only in UA, SA, UAn, and SAn samples

| Taxonomy                                                                                                            | Burial microcosm |
|---------------------------------------------------------------------------------------------------------------------|------------------|
| Bacteria; Actinobacteria; Actinomycetia; Micrococcales; Ruaniaceae; Ruania                                          | UA               |
| Bacteria; Firmicutes; Clostridia; Thermoanaerobacterales; Thermoanaerobacteraceae; Desulfoviregula                  | UA               |
| Bacteria; Actinobacteria; Actinomycetia; Micrococcales; Unclassified Micrococcales; Luteimicrobium                  | UA               |
| Bacteria; Firmicutes; Bacilli; Bacillales; Bacillaceae; Fredinandcohnia                                             | UA               |
| Bacteria; Bacteroidetes; Cytophagia; Cytophagales; Hymenobacteraceae; Pontibacter                                   | UA               |
| Bacteria; Actinobacteria; Actinomycetia; Micrococcales; Micrococcaceae; Glutamicibacter                             | UA               |
| Bacteria; Proteobacteria; Gammaproteobacteria; Xanthomonadales; Xanthomonadaceae; Thermomonas                       | UA               |
| Bacteria; Bacteroidetes; Sphingobacteriia; Sphingobacteriales; Sphingobacteriaceae; Sphingobacterium                | UA               |
| Bacteria; Acidobacteria; Acidobacteriia; Acidobacteriales; Acidobacteriaceae; Acidipila                             | UA               |
| Bacteria; Proteobacteria; Betaproteobacteria; Burkholderiales; Alcaligenaceae; Alcaligenes                          | UA               |
| Bacteria; Proteobacteria; Deltaproteobacteria; Myxococcales; Polyangiaceae; Polyangium                              | UA               |
| Bacteria; Proteobacteria; Gammaproteobacteria; Enterobacterales; Morganellaceae; Providencia                        | UA               |
| Bacteria; Actinobacteria; Actinomycetia; Pseudonocardiales; Pseudonocardaceae; Actinokineospora                     | UA               |
| Bacteria; Proteobacteria; Alphaproteobacteria; Rhodospirillales; Rhodospirillaceae; Rhodovibrio                     | UA               |
| Bacteria; Actinobacteria; Actinomycetia; Streptosporangiales; Nocardopsaceae; Nocardiosis                           | UA               |
| Bacteria; Proteobacteria; Alphaproteobacteria; Rhodospirillales; Rhodospirillaceae; Ferrovibrio                     | UA               |
| Bacteria; Proteobacteria; Gammaproteobacteria; Xanthomonadales; Xanthomonadaceae; Stenotrophomonas                  | UA               |
| Bacteria; Proteobacteria; Betaproteobacteria; Burkholderiales; Oxalobacteraceae; Novihervaspirillum                 | UA               |
| Bacteria; Firmicutes; Clostridia; Eubacteriales; Lachnospiraceae; Anaerobium                                        | UA               |
| Bacteria; Firmicutes; Clostridia; Eubacteriales; Lachnospiraceae; Acetatifactor                                     | UA               |
| Bacteria; Proteobacteria; Alphaproteobacteria; Hyphomicrobiales; Kaistiaceae; Kaistia                               | UA               |
| Bacteria; Proteobacteria; Alphaproteobacteria; Caulobacterales; Caulobacteraceae; Asticcacaulis                     | UA               |
| Bacteria; Firmicutes; Clostridia; Eubacteriales; Heliobacteriaceae; Heliophilum                                     | UA               |
| Bacteria; Proteobacteria; Deltaproteobacteria; Syntrophobacterales; Syntrophobacteraceae; Desulfoglaeba             | UA               |
| Bacteria; Proteobacteria; Oligoflexia; Oligoflexales; Oligoflexaceae; Oligoflexus                                   | UA               |
| Bacteria; Bacteroidetes; Flavobacteriia; Flavobacteriales; Flavobacteriaceae; Myroides                              | UA               |
| Bacteria; Actinobacteria; Actinomycetia; Geodermatophilales; Geodermatophilaceae; Cumulibacter                      | UA               |
| Bacteria; Proteobacteria; Alphaproteobacteria; Caulobacterales; Caulobacteraceae; Caulobacter                       | UA               |
| Bacteria; Firmicutes; Clostridia; Eubacteriales; Clostridiaceae; Natronincola                                       | UA               |
| Bacteria; Proteobacteria; Deltaproteobacteria; Desulfuromonadales; Geobacteraceae; Geothermobacter                  | UA               |
| Bacteria; Firmicutes; Clostridia; Eubacteriales; Lachnospiraceae; Lachnotalea                                       | UA               |
| Bacteria; Proteobacteria; Gammaproteobacteria; Methylococcales; Methylococcaceae; Methylocaldum                     | UA               |
| Bacteria; Firmicutes; Clostridia; Eubacteriales; Oscillospiraceae; Pseudoflavonifractor                             | UA               |
| Bacteria; Actinobacteria; Actinomycetia; Streptosporangiales; Streptosporangiaceae; Sphaerimonspora                 | UA               |
| Bacteria; Acidobacteria; Thermoanaerobactulia; Thermoanaerobactulales; Thermoanaerobactulaceae; Thermoanaerobaculum | UA               |
| Bacteria; Proteobacteria; Gammaproteobacteria; Enterobacterales; Enterobacteriaceae; Pseudocitrobacter              | UA               |
| Bacteria; Actinobacteria; Actinomycetia; Micromonosporales; Micromonosporaceae; Salinispora                         | UA               |
| Bacteria; Proteobacteria; Gammaproteobacteria; Methylococcales; Methylococcaceae; Methylococcus                     | UA               |
| Bacteria; Firmicutes; Clostridia; Eubacteriales; Oscillospiraceae; Hydrogenoanaerobacterium                         | UA               |
| Bacteria; Proteobacteria; Gammaproteobacteria; Oceanospirillales; Oceanospirillaceae; Nitrincola                    | UA               |
| Bacteria; Proteobacteria; Alphaproteobacteria; Hyphomicrobiales; Hyphomicrobiaceae; Filomicrobium                   | UA               |
| Bacteria; Firmicutes; Clostridia; Eubacteriales; Oscillospiraceae; Saccharofermentans                               | UA               |
| Bacteria; Bacteroidetes; Chitinophagia; Chitinophagales; Chitinophagaceae; Taibaiella                               | UA               |
| Bacteria; Firmicutes; Bacilli; Bacillales; Unclassified Bacillales; Desulfuribacillus                               | UA               |
| Bacteria; Actinobacteria; Actinomycetia; Micrococcales; Intrasporangiaceae; Knoellia                                | UA               |
| Bacteria; Proteobacteria; Gammaproteobacteria; Alteromonadales; Alteromonadaceae; Mangrovitalea                     | UA               |
| Bacteria; Proteobacteria; Alphaproteobacteria; Caulobacterales; Caulobacteraceae; Brevundimonas                     | UA               |
| Bacteria; Proteobacteria; Alphaproteobacteria; Hyphomicrobiales; Phyllobacteriaceae; Aminobacter                    | UA               |
| Bacteria; Bacteroidetes; Bacteroidia; Bacteroidales; Dysgonomonadaceae; Fermentimonas                               | UA               |
| Bacteria; Actinobacteria; Actinomycetia; Micrococcales; Ornithinimicrobiaceae; Ornithinimicrobium                   | UA               |
| Bacteria; Actinobacteria; Actinomycetia; Micromonosporales; Micromonosporaceae; Luedemannella                       | UA               |
| Bacteria; Actinobacteria; Actinomycetia; Micrococcales; Jonesiaceae; Flavimobilis                                   | UA               |
| Bacteria; Proteobacteria; Alphaproteobacteria; Hyphomicrobiales; Brucellaceae; Mycoplana                            | UA               |
| Bacteria; Proteobacteria; Alphaproteobacteria; Rhodospirillales; Acetobacteraceae; Acidisphaera                     | UA               |
| Bacteria; Actinobacteria; Actinomycetia; Micrococcales; Micrococcaceae; Enteractinococcus                           | UA               |
| Bacteria; Verrucomicrobia; Verrucomicrobiae; Verrucomicrobiales; Verrucomicrobiaceae; Verrucomicrobium              | UA               |
| Bacteria; Firmicutes; Clostridia; Eubacteriales; Defluviitaleaceae; Defluviitalea                                   | UA               |
| Bacteria; Bacteroidetes; Cytophagia; Cytophagales; Cytophagaceae; Leadbetterella                                    | UA               |
| Bacteria; Actinobacteria; Acidimicrobiia; Acidimicrobiales; Iamiaceae; Aquihabitans                                 | UA               |
| Bacteria; Firmicutes; Bacilli; Bacillales; Paenibacillaceae; Gorillibacterium                                       | UA               |
| Bacteria; Cyanobacteria; Unclassified Cyanobacteria; Nostocales; Calotrichaceae; Dulcicalothrix                     | UA               |
| Bacteria; Proteobacteria; Betaproteobacteria; Burkholderiales; Alcaligenaceae; Castellaniella                       | UA               |
| Bacteria; Bacteroidetes; Cytophagia; Cytophagales; Fulvivirgaceae; Chryseolinea                                     | UA               |
| Bacteria; Verrucomicrobia; Opitutae; Opitutales; Opitutaceae; Alterococcus                                          | UA               |
| Bacteria; Proteobacteria; Alphaproteobacteria; Rhodospirillales; Geminicoccaceae; Geminicoccus                      | UA               |
| Bacteria; Proteobacteria; Deltaproteobacteria; Unclassified Deltaproteobacteria; Dissulfurirhabdus                  | UA               |
| Bacteria; Actinobacteria; Actinomycetia; Micrococcales; Microbacteriaceae; Microbacterium                           | UA               |
| Bacteria; Firmicutes; Clostridia; Eubacteriales; Eubacteriaceae; Acetobacterium                                     | UA               |
| Bacteria; Proteobacteria; Betaproteobacteria; Burkholderiales; Comamonadaceae; Variovorax                           | UA               |
| Bacteria; Proteobacteria; Betaproteobacteria; Nitrosomonadales; Gallionellaceae; Sideroxydans                       | UA               |
| Bacteria; Proteobacteria; Gammaproteobacteria; Xanthomonadales; Xanthomonadaceae; Unclassified Xanthomonadaceae     | UA               |
| Bacteria; Proteobacteria; Alphaproteobacteria; Hyphomicrobiales; Rhizobiaceae; Sinorhizobium                        | UA               |
| Bacteria; Firmicutes; Clostridia; Eubacteriales; Oscillospiraceae; Ethanoligenens                                   | UA               |
| Bacteria; Acidobacteria; Acidobacteriia; Acidobacteriales; Acidobacteriaceae; Granulicella                          | UA               |

|                                                                                                                   |     |
|-------------------------------------------------------------------------------------------------------------------|-----|
| Bacteria; Proteobacteria; Alphaproteobacteria; Rhodospirillales; Rhodospirillaceae; Telmatospirillum              | UA  |
| Bacteria; Proteobacteria; Gammaproteobacteria; Chromatiales; Ectothiorhodospiraceae; Alkalilimnicola              | UA  |
| Bacteria; Proteobacteria; Deltaproteobacteria; Desulfobacterales; Desulfobacteraceae; Desulfatibaculum            | UA  |
| Bacteria; Actinobacteria; Coriobacterii; Eggerthellales; Eggerthellaceae; Paraeggerthella                         | UA  |
| Bacteria; Proteobacteria; Alphaproteobacteria; Rhodobacterales; Rhodobacteraceae; Thioclava                       | UA  |
| Bacteria; Firmicutes; Bacilli; Bacillales; Bacillaceae; Halolactibacillus                                         | UA  |
| Bacteria; Proteobacteria; Epsilonproteobacteria; Campylobacterales; Campylobacteraceae; Campylobacter             | UA  |
| Bacteria; Proteobacteria; Deltaproteobacteria; Myxococcales; Myxococcaceae; Pyxidicoccus                          | UA  |
| Bacteria; Proteobacteria; Gammaproteobacteria; Chromatiales; Ectothiorhodospiraceae; Thioalbus                    | UA  |
| Bacteria; Proteobacteria; Alphaproteobacteria; Hyphomicrobiales; Beijerinckiaceae; Pseudochelatococcus            | UA  |
| Bacteria; Proteobacteria; Alphaproteobacteria; Rhodobacterales; Rhodobacteraceae; Albimonas                       | UA  |
| Bacteria; Proteobacteria; Betaproteobacteria; Burkholderiales; Comamonadaceae; Diaphorobacter                     | UA  |
| Bacteria; Proteobacteria; Alphaproteobacteria; Hyphomicrobiales; Phyllobacteriaceae; Pseudaminobacter             | UA  |
| Bacteria; Proteobacteria; Alphaproteobacteria; Hyphomicrobiales; Xanthobacteraceae; Starkeya                      | UA  |
| Bacteria; Proteobacteria; Alphaproteobacteria; Hyphomicrobiales; Brucellaceae; Brucella                           | UA  |
| Bacteria; Proteobacteria; Betaproteobacteria; Burkholderiales; Alcaligenaceae; Pusillimonas                       | UA  |
| Bacteria; Firmicutes; Bacilli; Lactobacillales; Carnobacteriaceae; Pisciglobus                                    | UA  |
| Bacteria; Actinobacteria; Actinomycetia; Micrococcales; Bogoriellaceae; Georgenia                                 | UA  |
| Bacteria; Bacteroidetes; Chitinophagia; Chitinophagales; Chitinophagaceae; Chitinophaga                           | UA  |
| Bacteria; Proteobacteria; Oligoflexia; Bacteriovorales; Bacteriovoraceae; Peredibacter                            | UA  |
| Bacteria; Acidobacteria; Blastocatellia; Blastocatellales; Blastocatellaceae; Aridibacter                         | UA  |
| Bacteria; Actinobacteria; Actinomycetia; Corynebacteriales; Lawsonellaceae; Lawsonella                            | UA  |
| Bacteria; Proteobacteria; Deltaproteobacteria; Myxococcales; Myxococcaceae; Aggregicoccus                         | UA  |
| Bacteria; Firmicutes; Clostridia; Eubacteriales; Peptococcaceae; Thermincola                                      | UA  |
| Bacteria; Proteobacteria; Gammaproteobacteria; Xanthomonadales; Xanthomonadaceae; Pseudoxanthomonas               | UA  |
| Bacteria; Proteobacteria; Gammaproteobacteria; Xanthomonadales; Rhodanobacteraceae; Rhodanobacter                 | UA  |
| Bacteria; Firmicutes; Bacilli; Bacillales; Sporolactobacillaceae; Caenibacillus                                   | UA  |
| Bacteria; Firmicutes; Erysipelotrichia; Erysipelotrichales; Erysipelotrichaceae; Erysipelatoclostridium           | SA  |
| Bacteria; Firmicutes; Clostridia; Thermoanaerobacterales; Thermoanaerobacteraceae; Calderihabitans                | SA  |
| Bacteria; Firmicutes; Bacilli; Bacillales; Thermoactinomycetaceae; Desmospora                                     | SA  |
| Bacteria; Firmicutes; Clostridia; Eubacteriales; Oscillospiraceae; Harryflintia                                   | SA  |
| Bacteria; Baenolaeota; Baenolia; Baenolales; Baenolaceae; Rhodohalobacter                                         | SA  |
| Bacteria; Firmicutes; Bacilli; Lactobacillales; Enterococcaceae; Tetrageococcus                                   | SA  |
| Bacteria; Firmicutes; Bacilli; Bacillales; Unclassified Bacillales; Geomicrobium                                  | SA  |
| Bacteria; Firmicutes; Clostridia; Eubacteriales; Lachnospiraceae; Eisenbergiella                                  | SA  |
| Bacteria; Firmicutes; Bacilli; Bacillales; Paenibacillaceae; Xylanibacillus                                       | SA  |
| Bacteria; Proteobacteria; Gammaproteobacteria; Enterobacteriales; Enterobacteriaceae; Atlantibacter               | SA  |
| Bacteria; Firmicutes; Bacilli; Bacillales; Bacillaceae; Weizmannia                                                | SA  |
| Bacteria; Actinobacteria; Coriobacterii; Coriobacteriales; Atopobiaceae; Lancefieldella                           | SA  |
| Bacteria; Firmicutes; Negativicutes; Selenomonadales; Sporomusaceae; Desulfosporomusa                             | SA  |
| Bacteria; Firmicutes; Unclassified Firmicutes; Unclassified Firmicutes; Unclassified Firmicutes; Negativibacillus | SA  |
| Bacteria; Actinobacteria; Coriobacterii; Eggerthellales; Eggerthellaceae; Raoultibacter                           | SA  |
| Bacteria; Firmicutes; Clostridia; Eubacteriales; Clostridiaceae; Oxobacter                                        | SA  |
| Bacteria; Proteobacteria; Gammaproteobacteria; Chromatiales; Ectothiorhodospiraceae; Natronocella                 | SA  |
| Bacteria; Firmicutes; Clostridia; Eubacteriales; Peptococcaceae; Sporotomaculum                                   | SA  |
| Bacteria; Firmicutes; Bacilli; Bacillales; Bacillaceae; Falsibacillus                                             | SA  |
| Bacteria; Actinobacteria; Actinomycetia; Catenulesporales; Actinospicaceae; Actinocrinis                          | SA  |
| Bacteria; Firmicutes; Clostridia; Eubacteriales; Eubacteriaceae; Alkalibacter                                     | SA  |
| Bacteria; Bacteroidetes; Bacteroidia; Bacteroidales; Porphyromonadaceae; Macellibacteroides                       | SA  |
| Bacteria; Firmicutes; Clostridia; Eubacteriales; Clostridiaceae; Anoxyatronum                                     | UAn |
| Bacteria; Actinobacteria; Actinomycetia; Micrococcales; Demequinaceae; Demequina                                  | UAn |
| Bacteria; Planctomycetes; Planctomycetia; Isosphaerales; Isosphaeraceae; Isosphaera                               | UAn |
| Bacteria; Bacteroidetes; Bacteroidia; Bacteroidales; Prevotellaceae; Prevotellamassilia                           | UAn |
| Bacteria; Actinobacteria; Actinomycetia; Pseudonocardiales; Pseudonocardaceae; Actinophytocola                    | UAn |
| Bacteria; Proteobacteria; Deltaproteobacteria; Desulfuromonadales; Geobacteraceae; Geomonas (Geobacteraceae)      | UAn |
| Bacteria; Proteobacteria; Gammaproteobacteria; Xanthomonadales; Rhodanobacteraceae; Luteibacter                   | UAn |
| Bacteria; Proteobacteria; Deltaproteobacteria; Myxococcales; Polyangiaceae; Jahnella                              | UAn |
| Bacteria; Proteobacteria; Alphaproteobacteria; Hyphomicrobiales; Phyllobacteriaceae; Aquamicrobium                | UAn |
| Bacteria; Proteobacteria; Alphaproteobacteria; Rhodospirillales; Rhodospirillaceae; Tistlia                       | UAn |
| Bacteria; Proteobacteria; Betaproteobacteria; Burkholderiales; Comamonadaceae; Acidovorax                         | UAn |
| Bacteria; Actinobacteria; Actinomycetia; Streptosporangiales; Streptosporangiaceae; Sinosporangium                | UAn |
| Bacteria; Actinobacteria; Actinomycetia; Sporichthyales; Sporichthyaceae; Sporichthya                             | UAn |
| Bacteria; Bacteroidetes; Sphingobacterii; Sphingobacteriales; Sphingobacteriaceae; Daejeonella                    | UAn |
| Bacteria; Proteobacteria; Alphaproteobacteria; Hyphomicrobiales; Bradyrhizobiaceae; Rhodopseudomonas              | UAn |
| Bacteria; Proteobacteria; Betaproteobacteria; Burkholderiales; Burkholderiaceae; Burkholderia                     | UAn |
| Bacteria; Spirochaetes; Spirochaetia; Spirochaetales; Spirochaetaceae; Treponema                                  | UAn |
| Bacteria; Firmicutes; Clostridia; Eubacteriales; Peptostreptococcaceae; Asaccharospora                            | UAn |
| Bacteria; Bacteroidetes; Bacteroidia; Marinilabilliales; Marinilabillaceae; Geofilum                              | UAn |
| Bacteria; Proteobacteria; Alphaproteobacteria; Rhodospirillales; Acetobacteraceae; Caldovatus                     | UAn |
| Bacteria; Proteobacteria; Alphaproteobacteria; Sphingomonadales; Sphingomonadaceae; Blastomonas                   | UAn |
| Bacteria; Proteobacteria; Alphaproteobacteria; Hyphomicrobiales; Phyllobacteriaceae; Nitratireductor              | UAn |
| Bacteria; Bacteroidetes; Sphingobacterii; Sphingobacteriales; Sphingobacteriaceae; Pedobacter                     | UAn |
| Bacteria; Proteobacteria; Gammaproteobacteria; Xanthomonadales; Rhodanobacteraceae; Fulvimonas                    | UAn |
| Bacteria; Actinobacteria; Actinomycetia; Micromonosporales; Micromonosporaceae; Couchioplanes                     | UAn |
| Bacteria; Firmicutes; Bacilli; Bacillales; Planococcaceae; Metasolibacillus                                       | UAn |
| Bacteria; Bacteroidetes; Sphingobacterii; Sphingobacteriales; Sphingobacteriaceae; Mucilagibacter                 | UAn |
| Bacteria; Actinobacteria; Actinomycetia; Micrococcales; Micrococcaceae; Tersicoccus                               | UAn |

|                                                                                                                                           |     |
|-------------------------------------------------------------------------------------------------------------------------------------------|-----|
| Bacteria; Proteobacteria; Alphaproteobacteria; Rhodobacterales; Rhodobacteraceae; Rhodobacter                                             | UAn |
| Bacteria; Firmicutes; Bacilli; Bacillales; Bacillaceae; Hydrogenibacillus                                                                 | UAn |
| Bacteria; Chloroflexi; Thermomicrobia; Sphaerobacterales; Sphaerobacteraceae; Nitrolancea                                                 | UAn |
| Bacteria; Armatimonadetes; Armatimonadia; Armatimonadales; Armatimonadaceae; Armatimonas                                                  | UAn |
| Bacteria; Firmicutes; Clostridia; Eubacteriales; Lachnospiraceae; Abyssivirga                                                             | UAn |
| Bacteria; Proteobacteria; Gammaproteobacteria; Chromatiales; Ectothiorhodospiraceae; Inmirania                                            | UAn |
| Bacteria; Firmicutes; Clostridia; Eubacteriales; Peptostreptococcaceae; Peptoclostridium                                                  | UAn |
| Bacteria; Proteobacteria; Alphaproteobacteria; Rhodospirillales; Rhodospirillaceae; Taonella                                              | UAn |
| Bacteria; Bacteroidetes; Flavobacteriia; Flavobacteriales; Weeksellaceae; Kaistella                                                       | UAn |
| Bacteria; Proteobacteria; Alphaproteobacteria; Sphingomonadales; Erythrobacteraceae; Aurantiacibacter                                     | UAn |
| Bacteria; Firmicutes; Bacilli; Bacillales; Thermoactinomycetaceae; Polykladomyces                                                         | UAn |
| Bacteria; Actinobacteria; Actinomycetia; Streptomycetales; Streptomycetaceae; Embleya                                                     | UAn |
| Bacteria; Firmicutes; Negativicutes; Selenomonadales; Sporomusaceae; Pelosinus                                                            | UAn |
| Bacteria; Proteobacteria; Alphaproteobacteria; Hyphomicrobiales; Rhizobiaceae; Ensifer                                                    | UAn |
| Bacteria; Acidobacteria; Acidobacteriia; Acidobacteriales; Acidobacteriaceae; Acidicapsa                                                  | UAn |
| Bacteria; Bacteroidetes; Cytophagia; Cytophagales; Cytophagaceae; Sporocytophaga                                                          | UAn |
| Bacteria; Actinobacteria; Actinomycetia; Corynebacteriales; Mycobacteriaceae; Mycolicibacter                                              | UAn |
| Bacteria; Proteobacteria; Gammaproteobacteria; Pasteurellales; Pasteurellaceae; Glaesserella                                              | UAn |
| Bacteria; Firmicutes; Bacilli; Bacillales; Bacillaceae; Aeribacillus                                                                      | UAn |
| Bacteria; Bacteroidetes; Unclassified Bacteroidetes; Bacteroidetes Order II. Incertae sedis; Rhodothermaceae; Rhodothermus                | UAn |
| Bacteria; Actinobacteria; Actinomycetia; Pseudonocardiales; Pseudonocardaceae; Kutzneria                                                  | UAn |
| Bacteria; Proteobacteria; Alphaproteobacteria; Rhodobacterales; Rhodobacteraceae; Xinfangfangia                                           | UAn |
| Bacteria; Chloroflexi; Unclassified Chloroflexi; Unclassified Chloroflexi; Unclassified Chloroflexi; Thermobaculum                        | UAn |
| Bacteria; Actinobacteria; Actinomycetia; Propionibacteriales; Nocardioidaceae; Aeromicrobium                                              | UAn |
| Bacteria; Proteobacteria; Gammaproteobacteria; Enterobacterales; Enterobacteriaceae; Raoulitella                                          | UAn |
| Bacteria; Firmicutes; Clostridia; Eubacteriales; Clostridiaceae; Hungatella                                                               | UAn |
| Bacteria; Proteobacteria; Deltaproteobacteria; Desulfobacterales; Desulfobacteraceae; Desulfonema                                         | UAn |
| Bacteria; Planctomycetes; Planctomycetia; Pirellulales; Pirellulaceae; Roseimaritima                                                      | UAn |
| Bacteria; Proteobacteria; Deltaproteobacteria; Myxococcales; Archangiaceae; Hyalanguium                                                   | UAn |
| Bacteria; Baenoeleota; Baenoeleota; Baenoeleales; Baenoeleaceae; Aliifodinibius                                                           | UAn |
| Bacteria; Proteobacteria; Gammaproteobacteria; Enterobacterales; Enterobacteriaceae; Shigella                                             | UAn |
| Bacteria; Proteobacteria; Gammaproteobacteria; Xanthomonadales; Rhodanobacteraceae; Dyella                                                | UAn |
| Bacteria; Proteobacteria; Deltaproteobacteria; Desulfobacterales; Desulfobacteraceae; Desulfococcus                                       | UAn |
| Bacteria; Actinobacteria; Actinomycetia; Micrococcales; Microbacteriaceae; Agromyces                                                      | UAn |
| Bacteria; Proteobacteria; Gammaproteobacteria; Acidiferrobacterales; Acidiferrobacteraceae; Sulfuricaulis                                 | UAn |
| Bacteria; Proteobacteria; Deltaproteobacteria; Unclassified Deltaproteobacteria; Unclassified Deltaproteobacteria; Deferrisoma            | UAn |
| Bacteria; Acidobacteria; Acidobacteriia; Acidobacteriales; Acidobacteriaceae; Silvibacterium                                              | UAn |
| Bacteria; Firmicutes; Clostridia; Eubacteriales; Clostridiales Family XIII. Incertae Sedis; Aminipila                                     | UAn |
| Bacteria; Proteobacteria; Gammaproteobacteria; Xanthomonadales; Rhodanobacteraceae; Mizugakiibacter                                       | UAn |
| Bacteria; Bacteroidetes; Cytophagia; Cytophagales; Cytophagaceae; Ravibacter                                                              | UAn |
| Bacteria; Actinobacteria; Actinomycetia; Streptosporangiales; Streptosporangiaceae; Thermopolyspora                                       | UAn |
| Bacteria; Verrucomicrobia; Unclassified Verrucomicrobia; Unclassified Verrucomicrobia; Unclassified Verrucomicrobia; Methylocidimicrobium | UAn |
| Bacteria; Proteobacteria; Gammaproteobacteria; Enterobacterales; Erwiniaceae; Erwinia                                                     | UAn |
| Bacteria; Firmicutes; Bacilli; Bacillales; Bacillaceae; Saliterrubacillus                                                                 | UAn |
| Bacteria; Firmicutes; Bacilli; Bacillales; Bacillaceae; Salpaludibacillus                                                                 | UAn |
| Bacteria; Proteobacteria; Betaproteobacteria; Burkholderiales; Oxalobacteraceae; Oxalibacterium                                           | UAn |
| Bacteria; Proteobacteria; Gammaproteobacteria; Xanthomonadales; Xanthomonadaceae; Arenimonas                                              | UAn |
| Bacteria; Actinobacteria; Actinomycetia; Micrococcales; Promicromonosporaceae; Promicromonospora                                          | UAn |
| Bacteria; Actinobacteria; Actinomycetia; Micrococcales; Promicromonosporaceae; Isopterocola                                               | UAn |
| Bacteria; Proteobacteria; Betaproteobacteria; Burkholderiales; Oxalobacteraceae; Undibacterium                                            | UAn |
| Bacteria; Bacteroidetes; Bacteroidia; Marinilabiales; Marinilabillaceae; Mangroviflexus                                                   | UAn |
| Bacteria; Firmicutes; Negativicutes; Selenomonadales; Sporomusaceae; Anaerosinus                                                          | UAn |
| Bacteria; Proteobacteria; Deltaproteobacteria; Myxococcales; Polyangiaceae; Aetherobacter                                                 | UAn |
| Bacteria; Bacteroidetes; Sphingobacteriia; Sphingobacteriales; Sphingobacteriaceae; Solitalea                                             | UAn |
| Bacteria; Firmicutes; Clostridia; Eubacteriales; Peptostreptococcaceae; Acetoanaerobium                                                   | UAn |
| Bacteria; Firmicutes; Clostridia; Halanaerobiales; Halanaerobiaceae; Halothermothrix                                                      | UAn |
| Bacteria; Proteobacteria; Betaproteobacteria; Burkholderiales; Oxalobacteraceae; Duganella                                                | UAn |
| Bacteria; Chloroflexi; Anaerolineae; Anaerolineales; Anaerolineaceae; Ornatilinea                                                         | UAn |
| Bacteria; Bacteroidetes; Cytophagia; Cytophagales; Cytophagaceae; Rhodocytophaga                                                          | UAn |
| Bacteria; Proteobacteria; Gammaproteobacteria; Xanthomonadales; Rhodanobacteraceae; Frateuria                                             | UAn |
| Bacteria; Proteobacteria; Alphaproteobacteria; Rhodospirillales; Rhodospirillaceae; Elstera                                               | UAn |
| Bacteria; Proteobacteria; Alphaproteobacteria; Sphingomonadales; Sphingosinellaceae; Sphingosinella                                       | UAn |
| Bacteria; Proteobacteria; Alphaproteobacteria; Rhodospirillales; Rhodospirillaceae; Inquilinus                                            | UAn |
| Bacteria; Actinobacteria; Actinomycetia; Micromonosporales; Micromonosporaceae; Catellatospora                                            | UAn |
| Bacteria; Firmicutes; Clostridia; Eubacteriales; Oscillospiraceae; Subdoligranulum                                                        | SAn |
| Bacteria; Firmicutes; Bacilli; Lactobacillales; Lactobacillaceae; Lapidilactobacillus                                                     | SAn |
| Bacteria; Firmicutes; Clostridia; Eubacteriales; Eubacteriaceae; Anaerofustis                                                             | SAn |
| Bacteria; Actinobacteria; Actinomycetia; Actinomycetales; Actinomycetaceae; Actinomycetes                                                 | SAn |
| Bacteria; Firmicutes; Clostridia; Eubacteriales; Lachnospiraceae; Lachnobacterium                                                         | SAn |
| Bacteria; Firmicutes; Tissierellia; Tissierellales; Gottschalkiaceae; Gottschalkia                                                        | SAn |
| Bacteria; Proteobacteria; Alphaproteobacteria; Hyphomicrobiales; Chelatococcaceae; Chelatococcus                                          | SAn |
| Bacteria; Proteobacteria; Betaproteobacteria; Burkholderiales; Comamonadaceae; Pelomonas                                                  | SAn |
| Bacteria; Fusobacteria; Fusobacteriia; Fusobacteriales; Fusobacteriaceae; Fusobacterium                                                   | SAn |
| Bacteria; Proteobacteria; Deltaproteobacteria; Desulfovibrionales; Desulfovibrionaceae; Mailhella                                         | SAn |
| Bacteria; Firmicutes; Clostridia; Eubacteriales; Peptococcaceae; Dehalobacter                                                             | SAn |
| Bacteria; Proteobacteria; Alphaproteobacteria; Hyphomicrobiales; Methylobacteriaceae; Methylobacterium                                    | SAn |
| Bacteria; Actinobacteria; Actinomycetia; Micrococcales; Micrococcaceae; Falsarthrobacter                                                  | SAn |

|                                                                                                         |     |
|---------------------------------------------------------------------------------------------------------|-----|
| Bacteria; Firmicutes; Clostridia; Eubacteriales; Oscillospiraceae; Anaerofilum                          | SAn |
| Bacteria; Firmicutes; Bacilli; Bacillales; Bacillaceae; Calditerricola                                  | SAn |
| Bacteria; Firmicutes; Clostridia; Eubacteriales; Peptococcaceae; Desulfococcus                          | SAn |
| Bacteria; Firmicutes; Erysipelotrichia; Erysipelotrichales; Erysipelotrichaceae; Faecalibacterium       | SAn |
| Bacteria; Firmicutes; Bacilli; Bacillales; Bacillaceae; Piscibacillus                                   | SAn |
| Bacteria; Actinobacteria; Actinomycetia; Corynebacteriales; Dietziaceae; Dietzia                        | SAn |
| Bacteria; Firmicutes; Bacilli; Lactobacillales; Carnobacteriaceae; Granulicatella                       | SAn |
| Bacteria; Proteobacteria; Alphaproteobacteria; Hyphomicrobiales; Beijerinckiaceae; Methylocapsa         | SAn |
| Bacteria; Proteobacteria; Alphaproteobacteria; Hyphomicrobiales; Bradyrhizobiaceae; Afipia              | SAn |
| Bacteria; Firmicutes; Bacilli; Bacillales; Bacillaceae; Amphibacillus                                   | SAn |
| Bacteria; Firmicutes; Bacilli; Bacillales; Bacillaceae; Terribacillus                                   | SAn |
| Bacteria; Firmicutes; Clostridia; Thermoanaerobacterales; Thermoanaerobacteraceae; Thermodesulfatimonas | SAn |
| Bacteria; Firmicutes; Bacilli; Bacillales; Sporolactobacillaceae; Sporolactobacillus                    | SAn |
| Bacteria; Proteobacteria; Gammaproteobacteria; Xanthomonadales; Xanthomonadaceae; Xanthomonas           | SAn |
