# Supplementary material for: Composition and functional diversity of bacterial communities during swine carcass decomposition
Source: PubMed Central journal article supplement (PMC10472150; doi:10.5713/ab.23.0140), 2023-06-26
Supplement: ab-23-0140-Supplementary-Table-2.pdf [file ab-23-0140-Supplementary-Table-2.pdf]

Table S2. Taxonomic classification of shared bacterial genera present between UA, SA, UAn, and SAn samples

| Taxonomy                                                                                                                                          | Burial set-up |
|---------------------------------------------------------------------------------------------------------------------------------------------------|---------------|
| Bacteria; Bacteroidetes; Bacteroidia; Bacteroidales; Rikenellaceae; Alistipes                                                                     | UA/SA         |
| Bacteria; Firmicutes; Clostridia; Eubacteriales; Unclassified Eubacteriales; Natranaerovinga                                                      | UA/SA         |
| Bacteria; Proteobacteria; Gammaproteobacteria; Pseudomonadales; Moraxellaceae; Acinetobacter                                                      | UA/SA         |
| Bacteria; Proteobacteria; Betaproteobacteria; Burkholderiales; Burkholderiaceae; Ralstonia                                                        | UA/SA         |
| Bacteria; Proteobacteria; Betaproteobacteria; Burkholderiales; Alcaligenaceae; Achromobacter                                                      | UA/SA         |
| Bacteria; Proteobacteria; Alphaproteobacteria; Sphingomonadales; Sphingomonadaceae; Novosphingobium                                               | UA/SA         |
| Bacteria; Proteobacteria; Betaproteobacteria; Burkholderiales; Comamonadaceae; Comamonas                                                          | UA/SA         |
| Bacteria; Firmicutes; Bacilli; Bacillales; Thermactinomyces; Geothermophilum                                                                      | UAn/SA        |
| Bacteria; Proteobacteria; Betaproteobacteria; Burkholderiales; Comamonadaceae; Ramlibacter                                                        | UAn/SA        |
| Bacteria; Firmicutes; Bacilli; Bacillales; Planococcaceae; Jejuhalibacillus                                                                       | UAn/SA        |
| Bacteria; Firmicutes; Negativicutes; Veillonellales; Veillonellaceae; Allisonella                                                                 | UAn/SA        |
| Bacteria; Actinobacteria; Actinomycetia; Micrococcales; Micrococcaceae; Rothia                                                                    | UAn/SA        |
| Bacteria; Firmicutes; Bacilli; Bacillales; Paenibacillaceae; Thermobacillus                                                                       | UAn/SA        |
| Bacteria; Firmicutes; Clostridia; Eubacteriales; Unclassified Eubacteriales; Neglecta                                                             | UAn/SA        |
| Bacteria; Firmicutes; Clostridia; Eubacteriales; Oscillospiraceae; Phocoa                                                                         | SA/SA         |
| Bacteria; Firmicutes; Clostridia; Eubacteriales; Peptococcaceae; Desulfotomaculum                                                                 | SA/SA         |
| Bacteria; Firmicutes; Bacilli; Lactobacillales; Lactobacillaceae; Lactocaseibacillus                                                              | SA/SA         |
| Bacteria; Firmicutes; Bacilli; Bacillales; Bacillaceae; Aquibacillus                                                                              | SA/SA         |
| Bacteria; Actinobacteria; Coriobacteriales; Eggerthellales; Eggerthellaceae; Slackia                                                              | SA/SA         |
| Bacteria; Firmicutes; Clostridia; Eubacteriales; Peptococcaceae; Desulfosporosinus                                                                | SA/SA         |
| Bacteria; Firmicutes; Bacilli; Bacillales; Paenibacillaceae; Fontibacillus                                                                        | SA/SA         |
| Bacteria; Actinobacteria; Actinomycetia; Propionibacteriales; Propionibacteriaceae; Propionibacterium                                             | SA/SA         |
| Bacteria; Firmicutes; Tissierellia; Tissierellales; Peptoniphilaceae; Anaerococcus                                                                | SA/SA         |
| Bacteria; Firmicutes; Bacilli; Bacillales; Bacillaceae; Anaerobacillus                                                                            | SA/SA         |
| Bacteria; Proteobacteria; Betaproteobacteria; Burkholderiales; Oxalobacteraceae; Pseudoduganella                                                  | UA/UA         |
| Bacteria; Proteobacteria; Betaproteobacteria; Burkholderiales; Unclassified Burkholderiales; Tepidimonas                                          | UA/UA         |
| Bacteria; Proteobacteria; Gammaproteobacteria; Chromatiales; Granulosisolobaceae; Sulfuriflexus                                                   | UA/UA         |
| Bacteria; Proteobacteria; Betaproteobacteria; Burkholderiales; Unclassified Burkholderiales; Ideonella                                            | UA/UA         |
| Bacteria; Actinobacteria; Actinomycetia; Micromonosporales; Micromonosporaceae; Virgisporangium                                                   | UA/UA         |
| Bacteria; Proteobacteria; Alphaproteobacteria; Hyphomicrobiales; Stappiaceae; Labrenzia                                                           | UA/UA         |
| Bacteria; Proteobacteria; Alphaproteobacteria; Hyphomicrobiales; Xanthobacteraceae; Labrys                                                        | UA/UA         |
| Bacteria; Proteobacteria; Deltaproteobacteria; Myxococcales; Archangiaceae; Vitiosangium                                                          | UA/UA         |
| Bacteria; Cyanobacteria; Unclassified Cyanobacteria; Pleurocapsales; Dermocarpellaceae; Staniera                                                  | UA/UA         |
| Bacteria; Proteobacteria; Alphaproteobacteria; Hyphomicrobiales; Parvibaculaceae; Rhodoligotrophus                                                | UA/UA         |
| Bacteria; Firmicutes; Clostridia; Eubacteriales; Clostridiaceae; Abyssisolibacter                                                                 | UA/UA         |
| Bacteria; Proteobacteria; Betaproteobacteria; Burkholderiales; Comamonadaceae; Caldimonas                                                         | UA/UA         |
| Bacteria; Actinobacteria; Actinomycetia; Catenulesporales; Catenulesporaceae; Catenulespora                                                       | UA/UA         |
| Bacteria; Proteobacteria; Alphaproteobacteria; Holosporales; Caedimonadaceae; Caedimonas                                                          | UA/UA         |
| Bacteria; Proteobacteria; Alphaproteobacteria; Hyphomicrobiales; Hyphomicrobiaceae; Pedomicrobium                                                 | UA/UA         |
| Bacteria; Bacteroidetes; Chitinophagia; Chitinophagales; Chitinophagaceae; Sediminibacterium                                                      | UA/UA         |
| Bacteria; Proteobacteria; Gammaproteobacteria; Alteromonadales; Alteromonadaceae; Marinibacter                                                    | UA/UA         |
| Bacteria; Proteobacteria; Alphaproteobacteria; Hyphomicrobiales; Rhinobacteraceae; Agrobacterium                                                  | UA/UA         |
| Bacteria; Acidobacteria; Acidobacteriales; Bryobacteriales; Bryobacteraceae; Bryobacter                                                           | UA/UA         |
| Bacteria; Firmicutes; Bacilli; Bacillales; Thermactinomyces; Risingholia                                                                          | UA/UA         |
| Bacteria; Chlamydiae; Chlamydia; Parachlamydiales; Simkaniaceae; Simkania                                                                         | UA/UA         |
| Bacteria; Proteobacteria; Alphaproteobacteria; Rhodobacteriales; Rhodobacteraceae; Oceanicola                                                     | UA/UA         |
| Bacteria; Proteobacteria; Alphaproteobacteria; Rhodospirillales; Rhodospirillaceae; Alidongia                                                     | UA/UA         |
| Bacteria; Chloroflexi; Caldilineae; Caldilineales; Caldilineaceae; Litorilinea                                                                    | UA/UA         |
| Bacteria; Actinobacteria; Actinomycetia; Pseudonocardiales; Pseudonocardaceae; Actinomycetospora                                                  | UA/UA         |
| Bacteria; Actinobacteria; Actinomycetia; Micromonosporales; Micromonosporaceae; Phytobactans                                                      | UA/UA         |
| Bacteria; Proteobacteria; Alphaproteobacteria; Rhodospirillales; Acetobacteraceae; Acidibrevibacterium                                            | UA/UA         |
| Bacteria; Bacteroidetes; Cytophagia; Cytophagales; Hymenobacteraceae; Adhaeribacter                                                               | UA/UA         |
| Bacteria; Proteobacteria; Gammaproteobacteria; Enterobacteriales; Enterobacteriaceae; Enterobacter                                                | UA/UA         |
| Bacteria; Proteobacteria; Deltaproteobacteria; Myxococcales; Nannocystaceae; Nannocystis                                                          | UA/UA         |
| Bacteria; Actinobacteria; Actinomycetia; Micrococcales; Intrasporangiaceae; Terrabacter                                                           | UA/UA         |
| Bacteria; Chlamydiae; Chlamydia; Parachlamydiales; Parachlamydiaceae; Neochlamydia                                                                | UA/UA         |
| Bacteria; Actinobacteria; Actinomycetia; Micromonosporales; Micromonosporaceae; Asanoa                                                            | UA/UA         |
| Bacteria; Actinobacteria; Actinomycetia; Micromonosporales; Micromonosporaceae; Actinocatenispora                                                 | UA/UA         |
| Bacteria; Actinobacteria; Thermokopillia; Solirubrobacteriales; Comibacteriaceae; Comibacter                                                      | UA/UA         |
| Bacteria; Actinobacteria; Actinomycetia; Micrococcales; Premiomonosporaceae; Xylanibacterium                                                      | UA/UA         |
| Bacteria; Proteobacteria; Alphaproteobacteria; Sphingomonadales; Sphingomonadaceae; Sphingopyxis                                                  | UA/UA         |
| Bacteria; Proteobacteria; Betaproteobacteria; Nitrosomonadales; Nitrosomonadaceae; Nitrosomonas                                                   | UA/UA         |
| Bacteria; Actinobacteria; Actinomycetia; Geodermatophilales; Geodermatophilaceae; Modestobacter                                                   | UA/UA         |
| Bacteria; Firmicutes; Clostridia; Eubacteriales; Clostridiaceae; Falcatimonas                                                                     | UA/UA         |
| Bacteria; Actinobacteria; Actinomycetia; Acidothermales; Acidothermaceae; Acidothermus                                                            | UA/UA         |
| Bacteria; Proteobacteria; Deltaproteobacteria; Myxococcales; Vulgatibacteraceae; Vulgatibacter                                                    | UA/UA         |
| Bacteria; Actinobacteria; Actinomycetia; Jatrophihabitantes; Jatrophihabitantes; Jatrophihabitans                                                 | UA/UA         |
| Bacteria; Proteobacteria; Gammaproteobacteria; Xanthomonadales; Xanthomonadaceae; Chujaibacter                                                    | UA/UA         |
| Bacteria; Actinobacteria; Actinomycetia; Corynebacteriales; Nocardiaceae; Nocardia                                                                | UA/UA         |
| Bacteria; Proteobacteria; Deltaproteobacteria; Myxococcales; Polyangiaceae; Byssovorax                                                            | UA/UA         |
| Bacteria; Proteobacteria; Betaproteobacteria; Burkholderiales; Oxalobacteraceae; Herbaspirillum                                                   | UA/UA         |
| Bacteria; Firmicutes; Negativicutes; Selenomonadales; Sporomusaceae; Sporomusa                                                                    | UA/UA         |
| Bacteria; Proteobacteria; Alphaproteobacteria; Hyphomicrobiales; Methylocystaceae; Methylocystis                                                  | UA/UA         |
| Bacteria; Proteobacteria; Betaproteobacteria; Burkholderiales; Unclassified Burkholderiales; Rubrivivax                                           | UA/UA         |
| Bacteria; Proteobacteria; Alphaproteobacteria; Rhodospirillales; Azospirillaceae; Azospirillum                                                    | UA/UA         |
| Bacteria; Actinobacteria; Thermokopillia; Streptosporangiales; Streptosporangiaceae; Streptosporangium                                            | UA/UA         |
| Bacteria; Proteobacteria; Gammaproteobacteria; Neisseriales; Streptobacteriaceae; Prevallibacter                                                  | UA/UA         |
| Bacteria; Proteobacteria; Deltaproteobacteria; Desulfuromonadales; Geobacteraceae; Geoskaliaibacter                                               | UA/UA         |
| Bacteria; Proteobacteria; Deltaproteobacteria; Myxococcales; Anaeromyxobacteraceae; Anaeromyxobacter                                              | UA/UA         |
| Bacteria; Proteobacteria; Deltaproteobacteria; Desulfuromonadales; Geobacteraceae; Geobacter                                                      | UA/UA         |
| Bacteria; Chlamydiae; Chlamydia; Parachlamydiales; Parachlamydiaceae; Candidatus Protochlamydia                                                   | UA/UA         |
| Bacteria; Actinobacteria; Thermokopillia; Thermokopilliales; Thermokopillaceae; Thermokopillum                                                    | UA/UA         |
| Bacteria; Proteobacteria; Gammaproteobacteria; Cellvibrionales; Microbulbiferaceae; Microbulbifer                                                 | UA/UA         |
| Bacteria; Actinobacteria; Actinomycetia; Micrococcales; Micrococcaceae; Arthroacter                                                               | UA/UA         |
| Bacteria; Proteobacteria; Alphaproteobacteria; Caulobacteriales; Caulobacteraceae; Phenylbacterium                                                | UA/UA         |
| Bacteria; Proteobacteria; Alphaproteobacteria; Rhodospirillales; Acetobacteraceae; Stella                                                         | UA/UA         |
| Bacteria; Thermodesulfobacteria; Thermodesulfobacteriales; Thermodesulfobacteriaceae; Thermodesulfator                                            | UA/UA         |
| Bacteria; Planctomycetes; Planctomycetia; Isosphaerales; Isosphaeraceae; Singulisphaera                                                           | UA/UA         |
| Bacteria; Proteobacteria; Alphaproteobacteria; Rhodospirillales; Rhodospirillaceae; Magnetospirillum                                              | UA/UA         |
| Bacteria; Proteobacteria; Deltaproteobacteria; Myxococcales; Polyangiaceae; Chondromyces                                                          | UA/UA         |
| Bacteria; Chloroflexi; Chloroflexia; Chloroflexales; Oscillochloridaceae; Oscillochloris                                                          | UA/UA         |
| Bacteria; Chloroflexi; Ktedonobacteria; Thermogemmatiales; Thermogemmatiales; Thermogemmatispora                                                  | UA/UA         |
| Bacteria; Proteobacteria; Alphaproteobacteria; Rhodospirillales; Azospirillaceae; Skerminella                                                     | UA/UA         |
| Bacteria; Proteobacteria; Alphaproteobacteria; Rhodospirillales; Rhodospirillaceae; Oceanibaculum                                                 | UA/UA         |
| Bacteria; Proteobacteria; Alphaproteobacteria; Hyphomicrobiales; Hyphomicrobiaceae; Rhodomicrobium                                                | UA/UA         |
| Bacteria; Dictyoglomi; Dictyoglomia; Dictyoglomiales; Dictyoglomaceae; Dictyoglomus                                                               | UA/UA         |
| Bacteria; Actinobacteria; Actinomycetia; Streptosporangiales; Thermomonosporaceae; Thermostaphylospora                                            | UA/UA         |
| Bacteria; Proteobacteria; Alphaproteobacteria; Sphingomonadales; Erythrobacteraceae; Erythrobacter                                                | UA/UA         |
| Bacteria; Proteobacteria; Alphaproteobacteria; Hyphomicrobiales; Hyphomicrobiaceae; Methylocyanibacter                                            | UA/UA         |
| Bacteria; Proteobacteria; Betaproteobacteria; Rhodocyclales; Rhodocyclaceae; Oryzomicrobium                                                       | UA/UA         |
| Bacteria; Verrucomicrobia; Terrimicrobia; Terrimicrobiales; Terrimicrobiaceae; Terrimicrobium                                                     | UA/UA         |
| Bacteria; Proteobacteria; Alphaproteobacteria; Hyphomicrobiales; Kaistaceae; Bauldia                                                              | UA/UA         |
| Bacteria; Candidatus Melainabacteria; Unclassified Candidatus Melainabacteria; Vampirovibrionales; Unclassified Vampirovibrionales; Vampirovibrio | UA/UA         |
| Bacteria; Proteobacteria; Alphaproteobacteria; Micropepsales; Micropepsaceae; Rhizomicrobium                                                      | UA/UA         |
| Bacteria; Actinobacteria; Thermokopillia; Solirubrobacteriales; Parviterribacteraceae; Parviterribacter                                           | UA/UA         |
| Bacteria; Acidobacteria; Blastocatella; Blastocatellales; Pyrinomonadaceae; Pyrinomonas                                                           | UA/UA         |
| Bacteria; Chlamydiae; Chlamydia; Parachlamydiales; Waddliaceae; Waddlia                                                                           | UA/UA         |
| Bacteria; Bacteroidetes; Flavobacteria; Flavobacteriales; Flavobacteriaceae; Flavobacterium                                                       | UA/UA         |
| Bacteria; Actinobacteria; Actinomycetia; Pseudonocardiales; Pseudonocardaceae; Amycolatopsis                                                      | UA/UA         |
| Bacteria; Proteobacteria; Deltaproteobacteria; Myxococcales; Unclassified Myxococcales; Minicystis                                                | UA/UA         |
| Bacteria; Firmicutes; Bacilli; Bacillales; Thermactinomyces; Lihuauxella                                                                          | UA/UA         |
| Bacteria; Actinobacteria; Actinomycetia; Micrococcales; Intrasporangiaceae; Oryzihumus                                                            | UA/UA         |
| Bacteria; Actinobacteria; Actinomycetia; Micrococcales; Microbacteriaceae; Cryobacterium                                                          | UA/UA         |
| Bacteria; Proteobacteria; Alphaproteobacteria; Hyphomicrobiales; Boseaceae; Bosea                                                                 | UA/UA         |

|                                                                                                               |        |
|---------------------------------------------------------------------------------------------------------------|--------|
| Bacteria; Actinobacteria; Actinomycetia; Pseudonocardiales; Pseudonocardiales; Saccharopolyspora              | UA UAN |
| Bacteria; Proteobacteria; Betaproteobacteria; Burkholderiales; Burkholderiales; Trinickia                     | UA UAN |
| Bacteria; Actinobacteria; Actinomycetia; Micromonosporales; Micromonosporales; Hamadaea                       | UA UAN |
| Bacteria; Acidobacteria; Blastocatellia; Blastocatellales; Pyrinomonadaceae; Brevitalea                       | UA UAN |
| Bacteria; Actinobacteria; Actinomycetia; Streptosporangiales; Streptosporangiales; Thermobispora              | UA UAN |
| Bacteria; Planctomycetes; Planctomycetia; Planctomycetales; Planctomycetales; Rubinisphaera                   | UA UAN |
| Bacteria; Actinobacteria; Actinomycetia; Pseudonocardiales; Pseudonocardiales; Herbihabitans                  | UA UAN |
| Bacteria; Bacteroidetes; Chitinophagia; Chitinophagales; Chitinophagales; Nistella                            | UA UAN |
| Bacteria; Proteobacteria; Alphaproteobacteria; Hyphomicrobiales; Beijerinckiales; Methylovirgula              | UA UAN |
| Bacteria; Actinobacteria; Actinomycetia; Corynebacteriales; Mycobacteriales; Mycobacterium                    | UA UAN |
| Bacteria; Proteobacteria; Alphaproteobacteria; Hyphomicrobiales; Rhizobiales; Rhizobium                       | UA UAN |
| Bacteria; Actinobacteria; Nitrospirales; Euzoales; Euzoales; Euzoia                                           | UA UAN |
| Bacteria; Proteobacteria; Gammaproteobacteria; Xanthomonadales; Rhodospirillales; Rhodospirillum              | UA UAN |
| Bacteria; Planctomycetes; Phycisphaerae; Tepidiphysales; Tepidiphysales; Tepidiphysaera                       | UA UAN |
| Bacteria; Firmicutes; Clostridia; Eubacteriales; Lachnospirales; Herbinix                                     | UA UAN |
| Bacteria; Planctomycetes; Planctomycetia; Isosphaerales; Isosphaerales; Tundrisphaera                         | UA UAN |
| Bacteria; Chloroflexi; Chloroflexia; Chloroflexales; Roseiflexaceae; Roseiflexus                              | UA UAN |
| Bacteria; Verrucomicrobia; Verrucomicrobiae; Verrucomicrobiales; Verrucomicrobia subdivision 3; Limisphaera   | UA UAN |
| Bacteria; Proteobacteria; Alphaproteobacteria; Hyphomicrobiales; Methylocystaceae; Methylosinus               | UA UAN |
| Bacteria; Proteobacteria; Gammaproteobacteria; Chromatiales; Unclassified Chromatiales; Thiohalobacter        | UA UAN |
| Bacteria; Proteobacteria; Betaproteobacteria; Burkholderiales; Burkholderiales; Caballeronia                  | UA UAN |
| Bacteria; Proteobacteria; Alphaproteobacteria; Hyphomicrobiales; Unclassified Hyphomicrobiales; Nordella      | UA UAN |
| Bacteria; Proteobacteria; Alphaproteobacteria; Rhodospirillales; Rhodospirillales; Ferruginivarius            | UA UAN |
| Bacteria; Bacteroidetes; Chitinophagia; Chitinophagales; Chitinophagales; Parafilimonas                       | UA UAN |
| Bacteria; Planctomycetes; Planctomycetia; Planctomycetales; Planctomycetales; Gimesia                         | UA UAN |
| Bacteria; Proteobacteria; Betaproteobacteria; Nitrosomonadales; Sterolibacteriales; Methyloversatilis         | UA UAN |
| Bacteria; Bacteroidetes; Bacteroidia; Bacteroidales; Prevotellaceae; Paraprevotella                           | UA UAN |
| Bacteria; Proteobacteria; Betaproteobacteria; Burkholderiales; Burkholderiales; Paraburkholderia              | UA UAN |
| Bacteria; Gemmatimonadetes; Gemmatimonadetes; Gemmatimonadales; Gemmatimonadaceae; Gemmatirosa                | UA UAN |
| Bacteria; Proteobacteria; Alphaproteobacteria; Rhodospirillales; Rhodospirillales; Lachibacterium             | UA UAN |
| Bacteria; Actinobacteria; Actinomycetia; Corynebacteriales; Nocardiaceae; Rhodococcus                         | UA UAN |
| Bacteria; Planctomycetes; Planctomycetia; Pirellulales; Thermoguttaceae; Thermogutta                          | UA UAN |
| Bacteria; Firmicutes; Clostridia; Eubacteriales; Peptococcales; Desulfocarcinon                               | UA UAN |
| Bacteria; Chloroflexi; Chloroflexia; Chloroflexales; Chloroflexaceae; Chloroflexus                            | UA UAN |
| Bacteria; Actinobacteria; Actinomycetia; Streptosporangiales; Nocardiosporeae; Thermobifida                   | UA UAN |
| Bacteria; Proteobacteria; Deltaproteobacteria; Syntrophobacterales; Syntrophaceae; Desulfomona                | UA UAN |
| Bacteria; Proteobacteria; Deltaproteobacteria; Myxococcales; Kolleriaceae; Halangium                          | UA UAN |
| Bacteria; Synergistetes; Synergistia; Synergistales; Synergistaceae; Thermanaerovibrio                        | UA UAN |
| Bacteria; Chloroflexi; Anaerolineae; Anaerolineales; Anaerolineaceae; Bellilinea                              | UA UAN |
| Bacteria; Proteobacteria; Alphaproteobacteria; Hyphomicrobiales; Roseiariaceae; Roseiarius                    | UA UAN |
| Bacteria; Armatimonadetes; Chthonomonadetes; Chthonomonadales; Chthonomonadaceae; Chthonomonas                | UA UAN |
| Bacteria; Proteobacteria; Gammaproteobacteria; Legionellales; Coxiellaceae; Aquicella                         | UA UAN |
| Bacteria; Proteobacteria; Alphaproteobacteria; Rhodospirillales; Unclassified Rhodospirillales; Revranella    | UA UAN |
| Bacteria; Proteobacteria; Deltaproteobacteria; Myxococcales; Polyunguicaceae; Sorangium                       | UA UAN |
| Bacteria; Planctomycetes; Planctomycetia; Gemmatales; Gemmataceae; Zavarzinella                               | UA UAN |
| Bacteria; Firmicutes; Clostridia; Eubacteriales; Proteinivoraceae; Proteinivora                               | UA UAN |
| Bacteria; Proteobacteria; Alphaproteobacteria; Rhodospirillales; Gemminococcales; Arboicoccus                 | UA UAN |
| Bacteria; Proteobacteria; Alphaproteobacteria; Rhodospirillales; Rhodospirillales; Fodinivirvata              | UA UAN |
| Bacteria; Actinobacteria; Acidimicrobia; Acidimicrobiales; Ilumatobacteraceae; Ilumatobacter                  | UA UAN |
| Bacteria; Proteobacteria; Betaproteobacteria; Rhodocyclales; Azonoxaceae; Ferribacterium                      | UA UAN |
| Bacteria; Proteobacteria; Gammaproteobacteria; Xanthomonadales; Xanthomonadaceae; Lysobacter                  | UA UAN |
| Bacteria; Proteobacteria; Alphaproteobacteria; Hyphomicrobiales; Rhodobiaceae; Tepidamorphus                  | UA UAN |
| Bacteria; Proteobacteria; Betaproteobacteria; Rhodocyclales; Zoogloaceae; Azoriscus                           | UA UAN |
| Bacteria; Proteobacteria; Alphaproteobacteria; Hyphomicrobiales; Alsobacteraceae; Alsobacter                  | UA UAN |
| Bacteria; Planctomycetes; Planctomycetia; Pirellulales; Pirellulaceae; Pirellula                              | UA UAN |
| Bacteria; Proteobacteria; Alphaproteobacteria; Rhodospirillales; Azospirillaceae; Desertibacter               | UA UAN |
| Bacteria; Actinobacteria; Actinomycetia; Micrococcales; Intrasporangiales; Intrasporangium                    | UA UAN |
| Bacteria; Proteobacteria; Alphaproteobacteria; Hyphomicrobiales; Rhizobiaceae; Shinella                       | UA UAN |
| Bacteria; Actinobacteria; Actinomycetia; Micrococcales; Cellulomonadales; Cellulomonas                        | UA UAN |
| Bacteria; Cyanobacteria; Unclassified Cyanobacteria; Nostocales; Nostocaceae; Nostoc                          | UA UAN |
| Bacteria; Proteobacteria; Gammaproteobacteria; Chromatiales; Thioprofundaceae; Thioprofundum                  | UA UAN |
| Bacteria; Proteobacteria; Alphaproteobacteria; Rhodospirillales; Azobacteraceae; Acidisoma                    | UA UAN |
| Bacteria; Proteobacteria; Gammaproteobacteria; Legionellales; Legionellaceae; Legionella                      | UA UAN |
| Bacteria; Verrucomicrobia; Verrucomicrobiae; Verrucomicrobiales; Verrucomicrobiaceae; Lutolibacter            | UA UAN |
| Bacteria; Proteobacteria; Betaproteobacteria; Nitrosomonadales; Nitrosomonadaceae; Nitrospiria                | UA UAN |
| Bacteria; Proteobacteria; Betaproteobacteria; Rhodocyclales; Rhodocyclaceae; Propionivibrio                   | UA UAN |
| Bacteria; Actinobacteria; Actinomycetia; Streptosporangiales; Thermomonosporaceae; Actinocorallia             | UA UAN |
| Bacteria; Proteobacteria; Oligoflexia; Bdellovibrionales; Bdellovibrionaceae; Bdellovibrio                    | UA UAN |
| Bacteria; Proteobacteria; Betaproteobacteria; Burkholderiales; Unclassified Burkholderiales; Piscinibacterium | UA UAN |
| Bacteria; Proteobacteria; Deltaproteobacteria; Myxococcales; Myxococaceae; Myxococcus                         | UA UAN |
| Bacteria; Bacteroidetes; Cytophagia; Cytophagales; Fulvivirgaceae; Ohtaekwangia                               | UA UAN |
| Bacteria; Proteobacteria; Gammaproteobacteria; Enterobacterales; Enterobacteriaceae; Khuyvera                 | UA UAN |
| Bacteria; Chloroflexi; Thermomicrobia; Thermomicrobiales; Thermomicrobiaceae; Thermomicrobium                 | UA UAN |
| Bacteria; Proteobacteria; Deltaproteobacteria; Myxococcales; Kolleriaceae; Kolleria                           | UA UAN |
| Bacteria; Proteobacteria; Betaproteobacteria; Burkholderiales; Oxalobacteraceae; Massilia                     | UA UAN |
| Bacteria; Actinobacteria; Actinomycetia; Streptosporangiales; Streptosporangiales; Sphaerosporangium          | UA UAN |
| Bacteria; Proteobacteria; Deltaproteobacteria; Desulfurimonadales; Syntrophobacterales; Syntrophobacterales   | UA UAN |
| Bacteria; Proteobacteria; Alphaproteobacteria; Rhodospirillales; Azobacteraceae; Rhodopila                    | UA UAN |
| Bacteria; Actinobacteria; Actinomycetia; Micromonosporales; Micromonosporales; Dactylosporangium              | UA UAN |
| Bacteria; Proteobacteria; Alphaproteobacteria; Microspinales; Microspineae; Microspis                         | UA UAN |
| Bacteria; Actinobacteria; Acidimicrobia; Acidimicrobiales; Acidimicrobiaceae; Acidiferribacterium             | UA UAN |
| Bacteria; Bacteroidetes; Chitinophagia; Chitinophagales; Chitinophagales; Flavitalea                          | UA UAN |
| Bacteria; Planctomycetes; Planctomycetia; Gemmatales; Gemmataceae; Gemmata                                    | UA UAN |
| Bacteria; Proteobacteria; Betaproteobacteria; Nitrosomonadales; Sterolibacteriaceae; Sulfurisoma              | UA UAN |
| Bacteria; Proteobacteria; Alphaproteobacteria; Hyphomicrobiales; Brucellaceae; Pseudochrobacterium            | UA UAN |
| Bacteria; Bacteroidetes; Sphingobacteria; Sphingobacteriales; Sphingobacteriaceae; Paraciticbacter            | UA UAN |
| Bacteria; Proteobacteria; Betaproteobacteria; Burkholderiales; Alcaligenaceae; Azohydromonas                  | UA UAN |
| Bacteria; Proteobacteria; Alphaproteobacteria; Hyphomicrobiales; Rhodobiaceae; Rhodobium                      | UA UAN |
| Bacteria; Proteobacteria; Betaproteobacteria; Burkholderiales; Unclassified Burkholderiales; Thiobacter       | UA UAN |
| Bacteria; Acidobacteria; Blastocatellia; Blastocatellales; Blastocatellaceae; Tellurimicrobium                | UA UAN |
| Bacteria; Bacteroidetes; Chitinophagia; Chitinophagales; Chitinophagales; Ferruginibacter                     | UA UAN |
| Bacteria; Firmicutes; Bacilli; Bacillales; Bacillaceae; Psychrobacillus                                       | UA UAN |
| Bacteria; Deinococcus; Thermus; Deinococci; Truoperales; Truoperaceae; Truopera                               | UA UAN |
| Bacteria; Proteobacteria; Alphaproteobacteria; Hyphomicrobiales; Methylobacteriaceae; Methylobacterium        | UA UAN |
| Bacteria; Proteobacteria; Betaproteobacteria; Burkholderiales; Burkholderiales; Robbsia                       | UA UAN |
| Bacteria; Chloroflexi; Ardentiacetalia; Ardentiacetiales; Ardentiacetaceae; Ardentiacetia                     | UA UAN |
| Bacteria; Planctomycetes; Planctomycetia; Isosphaerales; Isosphaerales; Aquisphaera                           | UA UAN |
| Bacteria; Bacteroidetes; Chitinophagia; Chitinophagales; Chitinophagales; Segetibacter                        | UA UAN |
| Bacteria; Actinobacteria; Actinomycetia; Pseudonocardiales; Pseudonocardiales; Salinifilum                    | UA UAN |
| Bacteria; Firmicutes; Bacilli; Bacillales; Bacillaceae; Litchfieldia                                          | UA UAN |
| Bacteria; Actinobacteria; Actinomycetia; Micrococcales; Promicromonosporaceae; Cellulosimicrobium             | UA UAN |
| Bacteria; Proteobacteria; Gammaproteobacteria; Pseudomonadales; Moraxellaceae; Psychrobacter                  | UA UAN |
| Bacteria; Gemmatimonadetes; Gemmatimonadetes; Gemmatimonadales; Gemmatimonadaceae; Gemmatimonas               | UA UAN |
| Bacteria; Actinobacteria; Acidimicrobia; Acidimicrobiales; Iamiaceae; Iamia                                   | UA UAN |
| Bacteria; Actinobacteria; Actinomycetia; Propionibacteriales; Nocardiodaceae; Marmoricola                     | UA UAN |
| Bacteria; Proteobacteria; Alphaproteobacteria; Rhodospirillales; Azospirillaceae; Niveispirillum              | UA UAN |
| Bacteria; Acidobacteria; Acidobacteria; Acidobacteriales; Acidobacteriaceae; Telmatobacter                    | UA UAN |
| Bacteria; Firmicutes; Bacilli; Bacillales; Bacillaceae; Quasibacillus                                         | UA UAN |
| Bacteria; Chlamydiae; Chlamydia; Parachlamydiales; Parachlamydiaceae; Parachlamydia                           | UA UAN |
| Bacteria; Actinobacteria; Actinomycetia; Micrococcales; Microbacteriales; Homoserinibacter                    | UA UAN |
| Bacteria; Gemmatimonadetes; Longimicrobia; Longimicrobiales; Longimicrobiaceae; Longimicrobium                | UA UAN |
| Bacteria; Proteobacteria; Betaproteobacteria; Nitrosomonadales; Sterolibacteriaceae; Denitratisoma            | UA UAN |
| Bacteria; Planctomycetes; Planctomycetia; Pirellulales; Thermoguttaceae; Thermostilla                         | UA UAN |
| Bacteria; Proteobacteria; Deltaproteobacteria; Myxococcales; Archangiaceae; Cystobacter                       | UA UAN |
| Bacteria; Proteobacteria; Gammaproteobacteria; Legionellales; Coxiellaceae; Coxiella                          | UA UAN |
| Bacteria; Planctomycetes; Planctomycetia; Planctomycetales; Planctomycetales; Planctopirus                    | UA UAN |
| Bacteria; Actinobacteria; Actinomycetia; Propionibacteriales; Kribbellaceae; Kribbella                        | UA UAN |
